# Supplementary material
Source: publisher figshare collection journal article supplement (https://tandf.figshare.com/ndownloader/files/16188533)
Supplement: Supplementary file 1 [file 16188533]

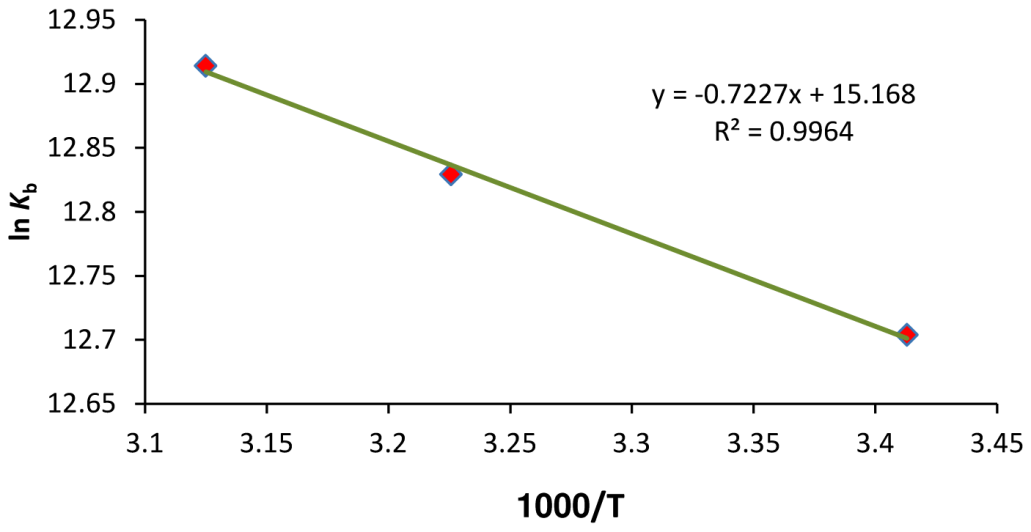


**Fig. S1. The plots of ln *K*b versus 1000/T for BSA-DVH system**


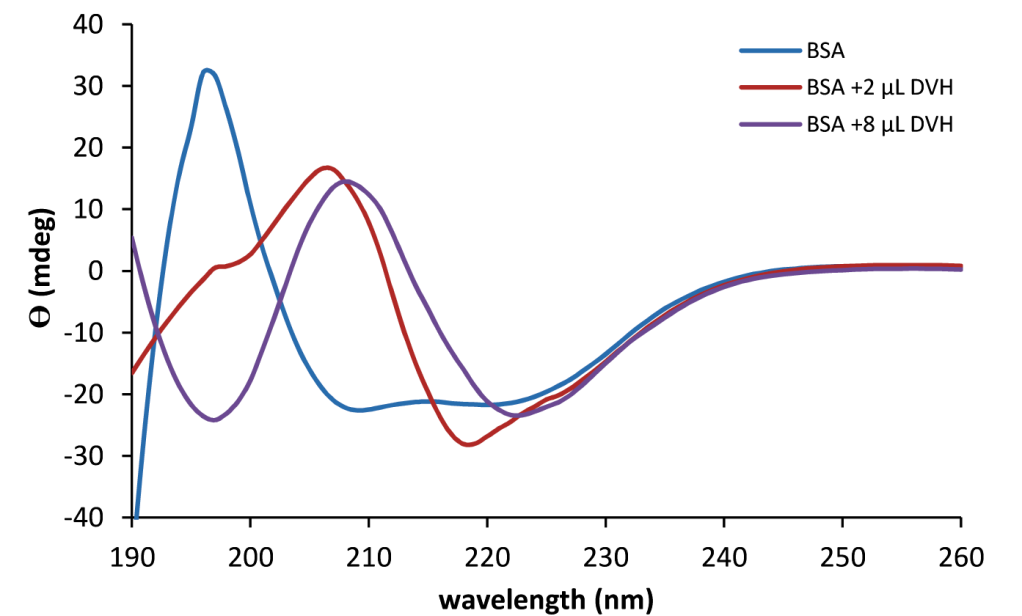


**Fig. S2. The Circular dichroism spectrum of BSA and DVH-BSA system at two different concentrations of DVH**


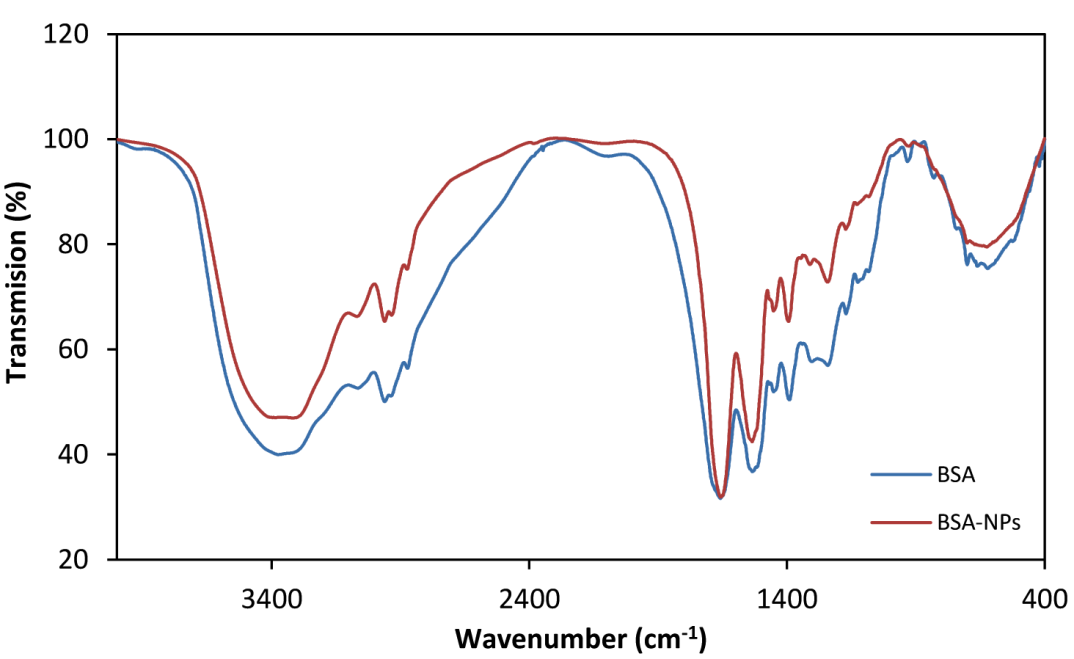


**Fig. S3. FTIR spectra of BSA (blue line) and BSA -NPs (red line)**


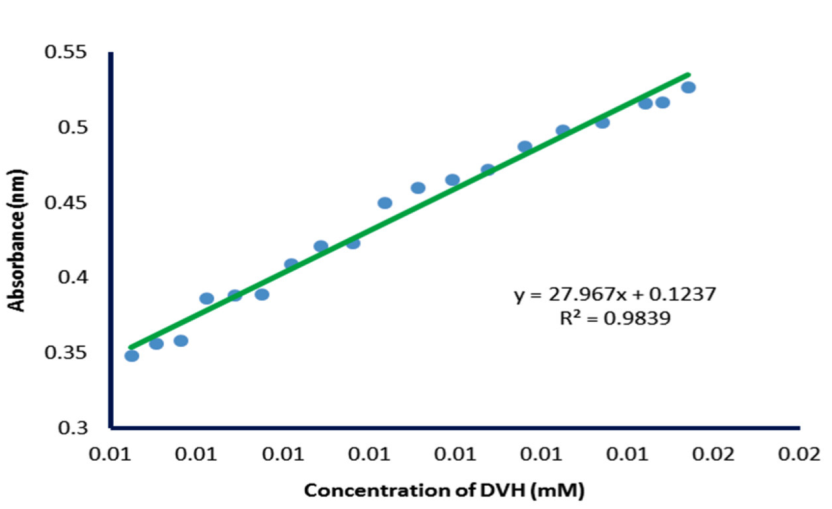


**Fig. S4. The standard calibration curve of DVH concentrations vs. absorbance in PBS and ethanolic stock at room temperature (λ =391 nm)**


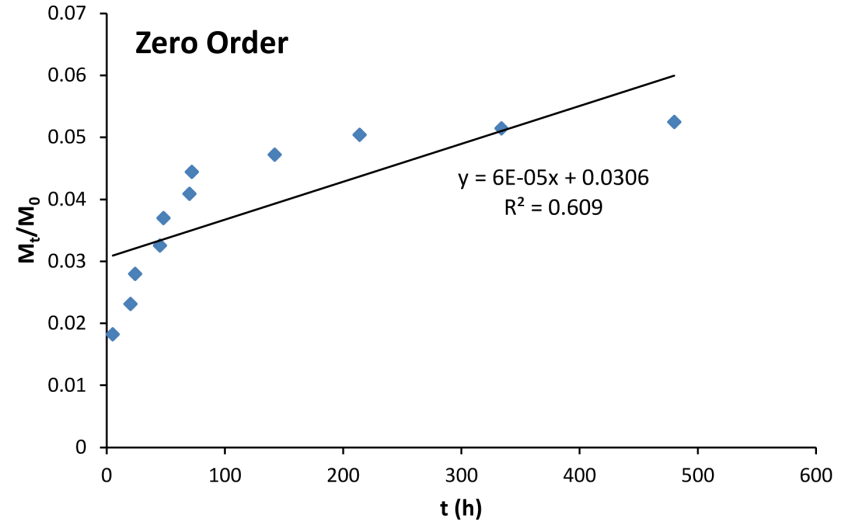


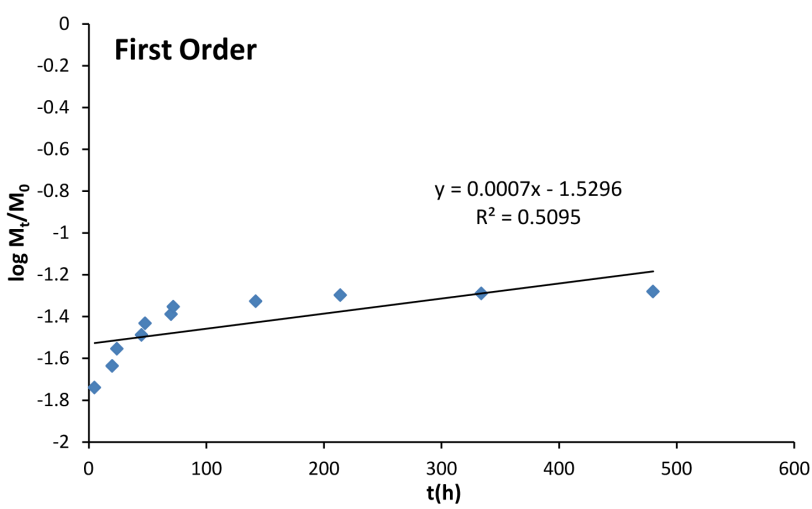


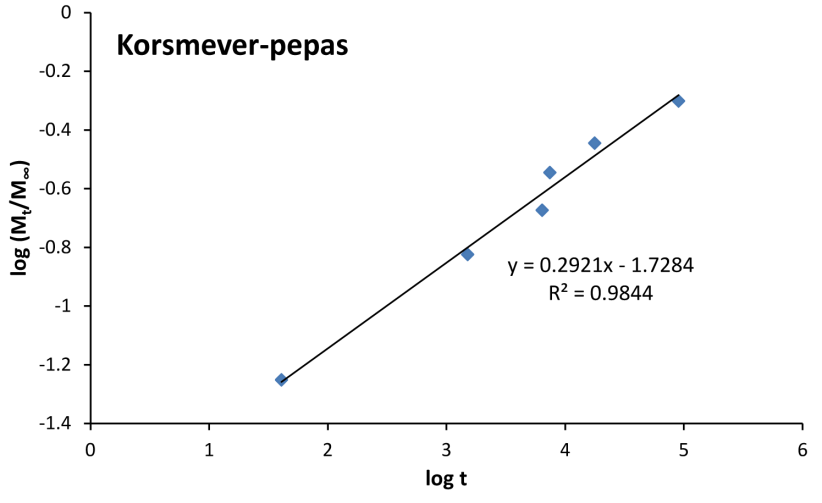


**Fig. S5. DVH release of BSANPs at pH 7.2**


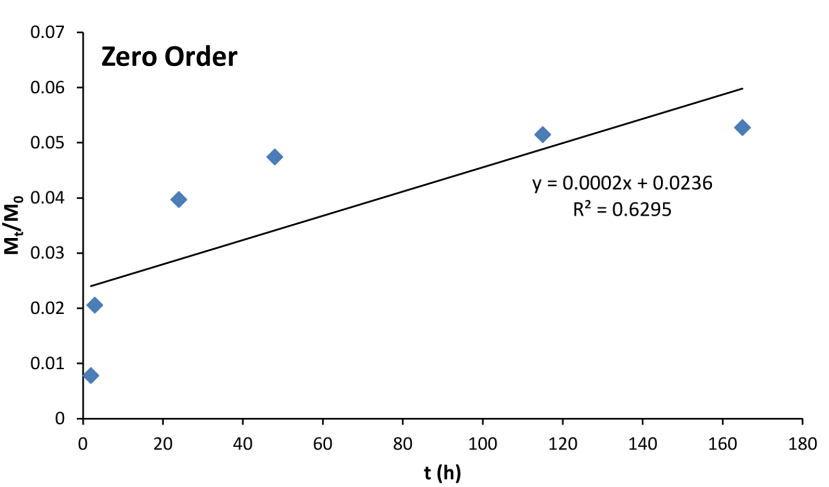


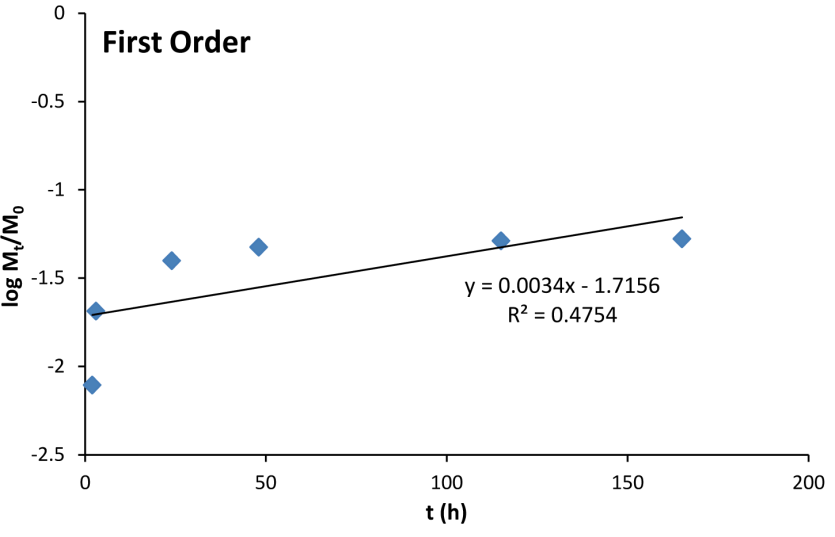


**
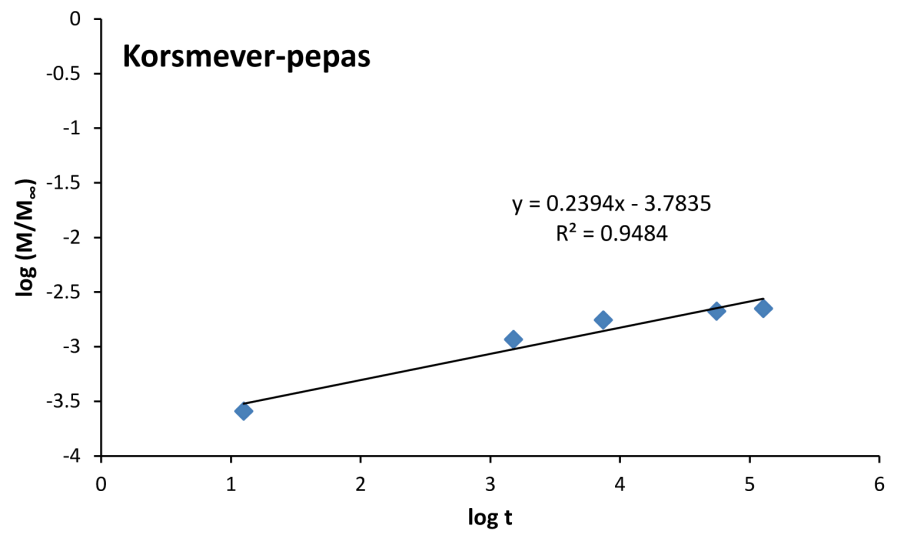
**

**Fig. S6. DVH release of BSANPs at pH 5.5**


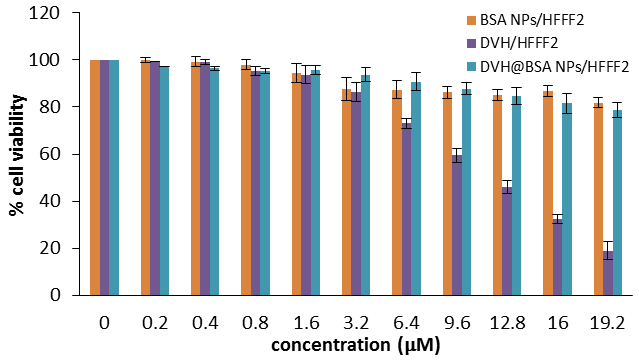


**Fig. S7. MTT assay of BSA NPs, DVH, DVH@BSANPs on HFFF2 normal cells**
